# Supplementary material for: Associations of Dietary-Lifestyle Patterns with Obesity and Metabolic Health: Two-Year Changes in MeDiSH® Study Cohort
Source: MDPI journal article supplement (doi:10.3390/ijerph192013647), 2022-10-21
Supplement: s1 [file s1]

## Supplementary Material

**Table S1.** Answer categories of lifestyle behaviours variables – supplement

| Lifestyle Behaviours                | Answer Categories to Choose From:                                                                                     |
|-------------------------------------|-----------------------------------------------------------------------------------------------------------------------|
| Daily meal frequency                | Five answers from one meal a day to five or more meals a day                                                          |
| Physical activity at work or school | Low—over 70% of time sedentary                                                                                        |
|                                     | Moderate—about 50% of time sedentary and 50% active                                                                   |
|                                     | Higher—about 70% of time active or physical labour of high intensity                                                  |
| Physical activity at leisure time   | Low—mostly sedentary, watching TV, reading newspapers/book, light house works, walking for 1–2 h a week               |
|                                     | Moderate—walking, cycling, exercise, gardening, or other light intensity physical activity for 2–3 h a week           |
|                                     | Higher—cycling, running, gardening, or other sport activities that require physical activity for more than 3 h a week |
| Past smoking                        | Yes/No                                                                                                                |
| Current smoking                     | Yes/No                                                                                                                |
| Screen time                         | Six categories: < 2 h/day, 2 to < 4 h/day, 4 to < 6 h/day, 6 to < 8 h/day, 8 to < 10 h/day, and ≥ 10 h/day            |

**Table S2.** Comparison of participating men who returned for the follow-up study (sub-sample before). vs. men who did not return for the follow-up stage (drop out) (means and SD or number of subjects and % of the sample).

| Variables                                    | Total Sample | Sub-Sample before | Drop Out   | p-Value # |
|----------------------------------------------|--------------|-------------------|------------|-----------|
| Number of subjects                           | 358          | 95                | 263        |           |
| <b>Socio-economic and demographic status</b> |              |                   |            |           |
| Age (years) ‡                                | 30.1 (5.9)   | 31.8 (5.3)        | 29.3 (6.0) | <0.0001   |
| <i>Age groups: n (%)</i>                     |              |                   |            | 0.00003   |
| 19-30 years                                  | 155(43)      | 24(25)            | 131(50)    |           |
| 31-40 years                                  | 203(57)      | 71(75)            | 132(65)    |           |
| <i>Place of residence: n(%)</i>              |              |                   |            | 0.009     |
| Villages and towns                           | 130(36)      | 24(25)            | 106(40)    |           |
| Big cities                                   | 228(63)      | 71(75)            | 157(60)    |           |
| <i>Economic status: n(%)</i>                 |              |                   |            | 0.37997   |
| Modest                                       | 97(27)       | 29(31)            | 68(26)     |           |
| Comfortable or wealthy                       | 261(73)      | 66(69)            | 195(74)    |           |
| <i>Education: n(%)</i>                       |              |                   |            | 0.00189   |
| Secondary or lower                           | 150(42)      | 27(28)            | 123(47)    |           |
| Higher                                       | 208(58)      | 68(72)            | 140(53)    |           |
| <b>Family status n(%)</b>                    |              |                   |            |           |
| <i>In relationship</i>                       |              |                   |            | 0.07178   |
| Yes                                          | 233(65)      | 69(73)            | 164(62)    |           |
| No                                           | 125(35)      | 26(27)            | 99(38)     |           |
| <i>Having children</i>                       |              |                   |            | 0.17833   |
| Yes                                          | 134(37)      | 41(43)            | 93(35)     |           |

|                                            |              |              |              |          |
|--------------------------------------------|--------------|--------------|--------------|----------|
| No                                         | 224(63)      | 54(57)       | 170(65)      |          |
| <b>Lifestyle factors: n(%)</b>             |              |              |              |          |
| <i>Number of meals per day</i>             |              |              |              | 0.268    |
| Three or less                              | 120(34)      | 29(30)       | 91(35)       |          |
| Four or more                               | 238(66)      | 66(70)       | 172(65)      |          |
| <i>Physical activity at work or school</i> |              |              |              | 0.90472  |
| Low                                        | 179(50)      | 48(51)       | 131(50)      |          |
| Moderate or high                           | 179(50)      | 47(49)       | 13250        |          |
| <i>Rereational physical activity</i>       |              |              |              | 0.14366  |
| Low                                        | 55(16)       | 19(20)       | 36(14)       |          |
| Moderate or high                           | 303(84)      | 76(80)       | 227(86)      |          |
| <i>Current smoking</i>                     |              |              |              | 0.306    |
| Yes                                        | 57(16)       | 12(13)       | 45(17)       |          |
| No                                         | 301(84)      | 83(87)       | 218(83)      |          |
| <i>Smoking in the past</i>                 |              |              |              | 0.69030  |
| Yes                                        | 138(39)      | 35(37)       | 103(39)      |          |
| No                                         | 220(61)      | 60(63)       | 160(61)      |          |
| <i>Screen time</i>                         |              |              |              | 0.00203  |
| 6 hours per day or moe                     | 159(44)      | 55(58)       | 104(40)      |          |
| Less than 6 hours                          | 199(56)      | 40(42)       | 159(60)      |          |
| <b>Diet quality scores: mean (SD)</b>      |              |              |              |          |
| pHDI                                       | 25.4 (11.6)  | 25.0 (10.8)  | 25.5(11.9)   | 0.694031 |
| nHDI                                       | 19.7 (7.9)   | 18.9 (8.1)   | 20.0 (7.8)   | 0.237645 |
| <b>Adiposity outcomes: mean (SD)</b>       |              |              |              |          |
| BMI [kg/m <sup>2</sup> ]                   | 26.0 (3.7)   | 26.1 (3.2)   | 25.9(3.8)    | 0.686002 |
| WC [cm]                                    | 89.9 (10.4)  | 90.5 (9.9)   | 89.7(10.6)   | 0.546546 |
| WHtR [-]                                   | 0.50 (0.1)   | 0.50 (0.1)   | 0.50(0.1)    | 0.593086 |
| Body fat [%]                               | 22.2 (6.8)   | 23.2 (6.7)   | 21.9(6.8)    | 0.109554 |
| Visceral fat tissue [l]                    | 1.96 (2.2)   | 2.1 (3.2)    | 1.9(1.7)     | 0.358942 |
| Skeletal muscle mass [%]                   | 38.8 (3.2)   | 38.3 (3.2)   | 39.0(3.2)    | 0.083995 |
| <b>Metabolic outcomes: mean (SD)</b>       |              |              |              |          |
| FBG [mg/dL]                                | 85.0 (13.4)  | 85.5 (12.3)  | 84.9(13.8)   | 0.696104 |
| TG [mg/dL]                                 | 143.1 (99.3) | 125.4 (75.8) | 149.5(106.0) | 0.042771 |
| TC [mg/dL]                                 | 185.6 (40.2) | 193.5 (34.8) | 182.8(41.7)  | 0.026585 |
| SBP [mmHg]                                 | 126.1 (12.0) | 126.9 (13.2) | 125.8(11.6)  | 0.475601 |
| DBP [mmHg]                                 | 77.4 (9.5)   | 77.9 (9.4)   | 77.2(9.6)    | 0.507978 |

<sup>#</sup>p-value of Pearson's chi-squared test for categorical variables and t-test for continues variables.

<sup>¥</sup> mean (standard deviation, SD); SD–standard deviation;

## Assessment of family socio-economic, demographic status and lifestyle factors

Question regarding place of residence consisted of four answers to choose from: villagetown < 20,000, town 20,000 to 100,000, city > 100,000 inhabitants. Level of education had three answer categories to choose from: lower secondary, upper secondary, higher. The financial situation was assessed using the following question: 'How would you describe your household's overall situation?'. Five answers were offered to choose from: (i) 'we do not have enough money for basic needs'—nobody reported such situation; (ii) 'we have to be very careful with our daily budget'; (iii) 'we have enough money for our daily needs, but we need to budget for bigger purchases'; (iv) 'we have enough money for our needs without particular budgeting'; and, (v) 'we can afford some luxury' [21,23]. Variables regarding family status considered: being in a relationship (Yes vs. No) and having children (Yes vs. No). Age as a part of demographic characteristics was provided as a continuous variable. The same procedure was applied to the men returning for the follow-up assessment.

**Table S3.** Characteristics of the total sample by age groups at baseline (number of subjects and % of the sample)

|                                              | Total sample | 19-30 years | 31-40 years | p-value |
|----------------------------------------------|--------------|-------------|-------------|---------|
| <b>Number of subjects</b>                    | 358 (100.0)  | 155 (43.3)  | 203 (56.7)  |         |
| <b>Socio-economic and demographic status</b> |              |             |             |         |
| <i>Place of residence</i>                    |              |             |             | <0.001  |
| Rural                                        | 130 (36.3)   | 74 (20.7)   | 49 (13.7)   |         |
| Urban                                        | 228 (63.7)   | 81 (22.6)   | 154 (43.0)  |         |
| <i>Economic status</i>                       |              |             |             | 0.489   |
| Modest                                       | 96 (26.8)    | 41 (11.5)   | 56 (15.6)   |         |
| Comfortable or wealthy                       | 261 (72.9)   | 114 (31.8)  | 147 (41.1)  |         |
| <i>Education</i>                             |              |             |             | <0.001  |
| Secondary or lower                           | 150 (41.9)   | 99 (27.6)   | 51 (14.3)   |         |
| Higher                                       | 208 (58.1)   | 56 (15.6)   | 152 (42.5)  |         |
| <b>Family status</b>                         |              |             |             |         |
| <i>Relationship status</i>                   |              |             |             | <0.001  |
| Not in a relationship                        | 125 (34.9)   | 90 (25.1)   | 35 (9.8)    |         |
| In a relationship                            | 233 (65.1)   | 65 (18.2)   | 168 (46.9)  |         |
| <i>Having children</i>                       |              |             |             | <0.001  |
| No                                           | 224 (62.6)   | 151 (42.2)  | 73 (20.4)   |         |
| Yes                                          | 134 (37.4)   | 4 (1.1)     | 130 (36.3)  |         |

p-value of Pearson's chi-squared test.

1  
2

**Table S4.** Adherence to upper tertiles of dietary-lifestyle patterns by family socioeconomic and demographic status:  
prevalence ratios (95% Confidence Intervals); higher vs lower adherence; p<0.05

| Variables                                               | Protein food, fried-food<br>and recreational<br>physical activity (n=32) |         | Sandwiches<br>and convenience foods<br>(n=31) |         | Fast foods and stimulants<br>(n=23) |         | Healthy diet, activity at<br>work, former smoking<br>(n=30) |         |
|---------------------------------------------------------|--------------------------------------------------------------------------|---------|-----------------------------------------------|---------|-------------------------------------|---------|-------------------------------------------------------------|---------|
|                                                         | PR (95% CI)                                                              | p-value | PR (95% CI)                                   | p-value | PR (95% CI)                         | p-value | PR (95% CI)                                                 | p-value |
| <b>Socio-economic and demographic status</b>            |                                                                          |         |                                               |         |                                     |         |                                                             |         |
| Age (years) ‡                                           | 0.93(0.83-1.04)                                                          | ns.     | 1.04(0.93-1.17)                               | ns.     | 0.95(0.85-1.06)                     | ns.     | 1.01 (0.90-1.14)                                            | ns.     |
| Age 19-30 years (vs. 31-40 years)                       | 1.02(0.91-1.14)                                                          | ns.     | 1.03(0.91-1.15)                               | ns.     | 1.03(0.91-1.15)                     | ns.     | 0.98(0.87-1.10)                                             | ns.     |
| Place of residence: Villages and towns (vs. big cities) | 0.96(0.86-1.08)                                                          | ns.     | 1.00(0.89-1.13)                               | ns.     | 1.01(0.89-1.13)                     | ns.     | 0.95(0.84-1.07)                                             | ns.     |
| Economic status: Modest (vs. comfortable or wealthy)    | 0.99(0.88-1.11)                                                          | ns.     | 1.00(0.90-1.12)                               | ns.     | 1.03(0.91-1.16)                     | ns.     | 1.05(0.93-1.18)                                             | ns.     |
| Education: Secondary or lower (vs. higher)              | 1.02(0.91-1.14)                                                          | ns.     | 1.00(0.90-1.12)                               | ns.     | 1.04(0.93-1.15)                     | ns.     | 1.06(0.95-1.18)                                             | ns.     |
| <b>Family status</b>                                    |                                                                          |         |                                               |         |                                     |         |                                                             |         |
| In relationship Yes (vs. No)                            | 0.99(0.88-1.12)                                                          | ns.     | 1.05(0.93-1.20)                               | ns.     | 1.01(0.89-1.14)                     | ns.     | 1.07(0.94-1.21)                                             | ns.     |
| Having children Yes (vs. No)                            | 1.05(0.91-1.21)                                                          | ns.     | 1.01(0.88-1.16)                               | ns.     | 1.05(0.91-1.22)                     | ns.     | 1.04(0.90-1.20)                                             | ns.     |

3

‡ age in years as continuous variable

**Table S5.** “Protein food, fried-food and recreational physical activity” pattern: diet quality scores, family socio-economic and demographic status, and adiposity and metabolic outcomes at baseline and after 2 years across the adherence <sup>1</sup> to the pattern.

| Variables                                                                          | Lower adherence (n=36) |             |         | Moderate adherence (n=27) |             |         | Higher adherence (n=32) |             |         |
|------------------------------------------------------------------------------------|------------------------|-------------|---------|---------------------------|-------------|---------|-------------------------|-------------|---------|
|                                                                                    | Baseline               | After 2 yrs | p-value | Baseline                  | After 2 yrs | p-value | Baseline                | After 2 yrs | p-value |
| <b>Diet quality scores: mean (SD)</b>                                              |                        |             |         |                           |             |         |                         |             |         |
| pHDI                                                                               | 19.7(9.4)              | 21.6(9.1)   | 0.120   | 22.31(8.8)                | 24.5(8.2)   | 0.247   | 33.1(9.0)               | 27.6(11.1)  | 0.011   |
| nHDI                                                                               | 18.3(8.1)              | 17.7(8.8)   | 0.601   | 19.3(7.8)                 | 17.0(8.8)   | 0.204   | 19.1(8.6)               | 17.3(7.5)   | 0.270   |
| <b>Socio-economic and demographic status: number of subjects (% of the sample)</b> |                        |             |         |                           |             |         |                         |             |         |
| Age (years) <sup>‡</sup>                                                           | 32.6(5.3)              | 34.5(5.4)   | 0.141   | 32.8(4.9)                 | 35.0(5.4)   | 0.127   | 30.8(5.5)               | 32.7(5.6)   | 0.187   |
| Age 19-30 years (vs. 31-40 years)                                                  | 8(22)                  | 8(22)       | 1.00    | 6(22)                     | 3(11)       | 0.273   | 10(31)                  | 7(22)       | 0.396   |
| Place of residence: Villages and towns (vs. big cities)                            | 10(28)                 | 9(25)       | 0.789   | 5(19)                     | 4(15)       | 0.715   | 9(28)                   | 8(25)       | 0.777   |
| Economic status: Modest (vs. comfortable or wealthy)                               | 12(33)                 | 4(11)       | 0.023   | 6(22)                     | 7(26)       | 0.750   | 11(34)                  | 11(34)      | 1.00    |
| Education: Secondary or lower (vs. higher)                                         | 13(36)                 | 11(31)      | 0.617   | 3(11)                     | 3(11)       | 1.00    | 11(24)                  | 9(28)       | 0.590   |
| <b>Family status: % of the sample (SD)</b>                                         |                        |             |         |                           |             |         |                         |             |         |
| In relationship Yes (vs. No)                                                       | 26(72)                 | 24(67)      | 0.609   | 21(78)                    | 22(81)      | 0.735   | 10(31)                  | 5(16)       | 0.140   |
| Having children Yes (vs. No)                                                       | 14(39)                 | 18(50)      | 0.343   | 13(48)                    | 16(59)      | 0.413   | 14(44)                  | 17(53)      | 0.453   |
| <b>Lifestyle factors: number of subjects (% of the sample)</b>                     |                        |             |         |                           |             |         |                         |             |         |
| Number of meals per day: 3 or less (vs. 4 or more)                                 | 23(64)                 | 19(53)      | 0.339   | 3(11)                     | 7(26)       | 0.161   | 1(3)                    | 5(16)       | 0.086   |
| Physical activity at work or school                                                | 23(64)                 | 22(61)      | 0.808   | 15(56)                    | 15(56)      | 1.00    | 10(31)                  | 13(41)      | 0.434   |
| Low (vs. moderate or high)                                                         |                        |             |         |                           |             |         |                         |             |         |
| Recreational physical activity                                                     | 14(39)                 | 7(19)       | 0.070   | 4(15)                     | 1(4)        | 0.159   | 1(3)                    | 1(3)        | 1.00    |
| Low (vs. moderate or high)                                                         |                        |             |         |                           |             |         |                         |             |         |
| Current smoking Yes (vs. No)                                                       | 7(19)                  | 5(14)       | 0.527   | 3(11)                     | 2(7)        | 0.639   | 2(6)                    | 4(13)       | 0.391   |
| Smoking in the past Yes (vs. No)                                                   | 19(53)                 | 15(42)      | 0.345   | 6(22)                     | 8(30)       | 0.535   | 10(31)                  | 12(38)      | 0.599   |
| Screen time                                                                        | 23(64)                 | 23(64)      | 1.00    | 21(78)                    | 19(70)      | 0.535   | 11(34)                  | 13(41)      | 0.606   |
| 6 hours per day or more (vs. less than 6 hours)                                    |                        |             |         |                           |             |         |                         |             |         |
| <b>Adiposity outcomes: mean (SD)</b>                                               |                        |             |         |                           |             |         |                         |             |         |
| BMI [kg/m <sup>2</sup> ]                                                           | 26.6(4.0)              | 26.9(4.4)   | 0.176   | 25.7(3.0)                 | 25.7(3.2)   | 0.959   | 25.9(2.1)               | 26.3(2.6)   | 0.251   |
| WC [cm]                                                                            | 91.9(11.6)             | 95.0(12.0)  | 0.005   | 88.9(9.6)                 | 90.1(10.0)  | 0.386   | 90.1(8.0)               | 92.2(8.2)   | 0.098   |
| WHtR [-]                                                                           | 0.51(0.06)             | 0.53(0.07)  | 0.009   | 0.49(0.05)                | 0.50(0.05)  | 0.340   | 0.49(0.03)              | 0.50(0.04)  | 0.085   |
| Body fat [%]                                                                       | 25.01(6.9)             | 25.3(6.8)   | 0.749   | 22.9(6.8)                 | 23.3(6.1)   | 0.537   | 21.2(6.1)               | 22.1(5.8)   | 0.330   |
| Visceral fat tissue [l]                                                            | 2.9(4.9)               | 2.6(1.8)    | 0.716   | 1.7(0.8)                  | 2.1(1.2)    | 0.064   | 1.7(1.1)                | 2.0(1.1)    | 0.099   |
| Skeletal muscle mass [%]                                                           | 37.2(3.2)              | 36.4(4.7)   | 0.243   | 38.5(3.1)                 | 38.2(2.8)   | 0.294   | 39.6(3.0)               | 39.0(2.9)   | 0.248   |
| <b>Metabolic outcomes: mean (SD)</b>                                               |                        |             |         |                           |             |         |                         |             |         |
| FBG [mg/dL]                                                                        | 88.0(13.2)             | 81.3(13.5)  | 0.013   | 86.0(12.0)                | 84.3(13.7)  | 0.532   | 82.2(11.2)              | 85.6(15.6)  | 0.352   |

|                                                                      |              |             |       |             |             |       |             |              |       |
|----------------------------------------------------------------------|--------------|-------------|-------|-------------|-------------|-------|-------------|--------------|-------|
| TG [mg/dL]                                                           | 145.1(105.6) | 150.5(82.5) | 0.818 | 115.1(48.3) | 119.9(76.3) | 0.777 | 112.0(46.0) | 133.3(100.7) | 0.284 |
| TC [mg/dL]                                                           | 190.8(30.9)  | 194.8(45.2) | 0.209 | 200.5(42.1) | 202.5(36.4) | 0.808 | 190.5(32.4) | 194.0(52.8)  | 0.683 |
| SBP [mmHg]                                                           | 128.7(14.7)  | 134.5(14.5) | 0.038 | 125.2(11.8) | 130.3(11.9) | 0.044 | 126.2(12.6) | 131.0(12.0)  | 0.088 |
| DBP [mmHg]                                                           | 78.6(10.3)   | 80.5(11.2)  | 0.173 | 78.6(10.8)  | 78.4(8.1)   | 0.881 | 76.6(6.8)   | 77.7(7.2)    | 0.301 |
| <b>Adiposity abnormalities: number of subjects (% of the sample)</b> |              |             |       |             |             |       |             |              |       |
| Normal weight (BMI = 18.5-24.9 kg/m <sup>2</sup> )                   | 17(47)       | 14(39)      |       | 10(37)      | 13(48)      |       | 9(28)       | 8(25)        |       |
| Overweight (BMI = 25-29.9 kg/m <sup>2</sup> )                        | 11(31)       | 14(39)      | 0.722 | 16(59)      | 13(48)      | 0.704 | 23(72)      | 21(66)       | 0.207 |
| Obesity (BMI ≥ 30 kg/m <sup>2</sup> )                                | 8(22)        | 8(22)       |       | 1(4)        | 1(4)        |       | 0(0)        | 3(9)         |       |
| Central obesity (WC ≥ 102 cm)                                        | 9(25)        | 9(25)       | 1.00  | 1(4)        | 3(11)       | 0.299 | 3(9)        | 3(9)         | 1.00  |
| Central obesity (WHtR ≥ 0.5)                                         | 18(50)       | 23(64)      | 0.234 | 10(37)      | 10(37)      | 1.00  | 13(41)      | 17(53)       | 0.316 |
| General obesity (Body fat ≥ 25%)                                     | 18(50)       | 18(50)      | 1.00  | 11(41)      | 8(30)       | 0.393 | 7(22)       | 11(34)       | 0.266 |
| Excess of visceral fat tissue (≥ Me, i.e., 1.565 l)                  | 20(56)       | 27(75)      | 0.083 | 17(63)      | 17(63)      | 1.00  | 13(41)      | 22(69)       | 0.024 |
| Increased skeletal muscle mass (≥ Me, i.e., 37%)                     | 18(50)       | 19(53)      | 0.814 | 16(59)      | 17(63)      | 0.780 | 26(81)      | 23(72)       | 0.376 |
| <b>Metabolic abnormalities: number of subjects (% of the sample)</b> |              |             |       |             |             |       |             |              |       |
| Elevated FBG (≥ 100 mg/dL)                                           | 5(14)        | 2(6)        | 0.233 | 3(11)       | 2(7)        | 0.639 | 1(3)        | 3(9)         | 0.302 |
| Elevated TG (≥ 150 mg/dL)                                            | 10(28)       | 14(39)      | 0.317 | 5(19)       | 7(26)       | 0.513 | 8(25)       | 8(25)        | 1.00  |
| Elevated TC (≥ 200 mg/dL)                                            | 17(47)       | 15(42)      | 0.635 | 14(52)      | 14(52)      | 1.00  | 12(38)      | 17(53)       | 0.209 |
| Elevated SBP (≥ 130 mmHg) or DBP (≥ 85 mmHg)                         | 17(47)       | 22(61)      | 0.237 | 13(48)      | 14(52)      | 0.786 | 12(38)      | 19(59)       | 0.080 |

<sup>1</sup> Adherence to the dietary-lifestyle pattern is based on subjects' tertile distribution: bottom tertile = lower adherence (used as the reference), middle tertile = moderate adherence, upper tertile = higher adherence; <sup>‡</sup> mean (standard deviation, SD); p-value of Pearson's chi-squared test (for categorical variables) or paired T-test (for continuous variables).

**Table S6.** “Sandwiches and convenience foods” pattern: diet quality scores, family socio-economic and demographic status, adiposity and metabolic outcomes at baseline and after 2 years across the adherence <sup>1</sup> to the pattern.

| Variables                                                                          | Lower Adherence (n=34) |              |         | Moderate Adherence (n=30) |             |         | Higher Adherence (n=31) |             |         |
|------------------------------------------------------------------------------------|------------------------|--------------|---------|---------------------------|-------------|---------|-------------------------|-------------|---------|
|                                                                                    | Baseline               | After 2 yrs  | p-value | Baseline                  | After 2 yrs | p-value | Baseline                | After 2 yrs | p-value |
| <b>Diet quality scores: mean (SD)</b>                                              |                        |              |         |                           |             |         |                         |             |         |
| pHDI                                                                               | 28.1(11.6)             | 26.1(11.3)   | 0.291   | 24.4(9.2)                 | 24.0(8.4)   | 0.802   | 22.0(10.7)              | 22.9(9.4)   | 0.576   |
| nHDI                                                                               | 12.2(4.9)              | 13.4(7.4)    | 0.297   | 18.1(3.8)                 | 19.2(7.0)   | 0.450   | 26.9(6.9)               | 20.0(9.0)   | <0.001  |
| <b>Socio-economic and demographic status: number of subjects (% of the sample)</b> |                        |              |         |                           |             |         |                         |             |         |
| Age (years) <sup>‡</sup>                                                           | 31.0(5.9)              | 32.9(6.0)    | 0.201   | 32.0(4.2)                 | 33.9(4.3)   | 0.089   | 33.4(5.4)               | 35.5(5.8)   | 0.142   |
| Age 19-30 years (vs. 31-40 years)                                                  | 12(35)                 | 8(24)        | 0.287   | 7(23)                     | 4(13)       | 0.317   | 7(23)                   | 6(19)       | 0.756   |
| Place of residence: Villages and towns (vs. big cities)                            | 9(26)                  | 10(29)       | 0.787   | 6(20)                     | 3(10)       | 0.278   | 9(29)                   | 8(26)       | 0.776   |
| Economic status: Modest (vs. comfortable or wealthy)                               | 11(32)                 | 9(26)        | 0.594   | 7(23)                     | 8(27)       | 0.766   | 11(35)                  | 5(16)       | 0.082   |
| Education: Secondary or lower (vs. higher)                                         | 11(16)                 | 11(16)       | 1.00    | 7(23)                     | 6(20)       | 0.754   | 9(29)                   | 6(19)       | 0.374   |
| <b>Family status: number of subjects (% of the sample)</b>                         |                        |              |         |                           |             |         |                         |             |         |
| In relationship Yes (vs. No)                                                       | 23(68)                 | 27(79)       | 0.271   | 23(76)                    | 24(80)      | 0.754   | 23(74)                  | 22(71)      | 0.776   |
| Having children Yes (vs. No)                                                       | 12(35)                 | 14(41)       | 0.618   | 14(47)                    | 17(57)      | 0.438   | 15(48)                  | 20(64)      | 0.200   |
| <b>Lifestyle factors: number of subjects (% of the sample)</b>                     |                        |              |         |                           |             |         |                         |             |         |
| Number of meals per day: 3 or less (vs. 4 or more)                                 | 7(21)                  | 14(41)       | 0.066   | 9(30)                     | 7(23)       | 0.559   | 11(35)                  | 10(32)      | 0.788   |
| Physical activity at work or school                                                | 14(41)                 | 15(44)       | 0.806   | 15(50)                    | 15(50)      | 1.00    | 19(61)                  | 20(65)      | 0.793   |
| Low (vs. moderate or high)                                                         |                        |              |         |                           |             |         |                         |             |         |
| Recreational physical activity                                                     | 3(9)                   | 3(9)         | 1.00    | 5(17)                     | 1(3)        | 0.086   | 11(35)                  | 5(16)       | 0.082   |
| Low (vs. moderate or high)                                                         |                        |              |         |                           |             |         |                         |             |         |
| Current smoking Yes (vs. No)                                                       | 2(6)                   | 3(9)         | 0.642   | 4(13)                     | 4(13)       | 1.00    | 6(19)                   | 4(13)       | 0.490   |
| Smoking in the past Yes (vs. No)                                                   | 10(29)                 | 12(35)       | 0.604   | 9(30)                     | 7(23)       | 0.559   | 16(52)                  | 16(52)      | 1.00    |
| Screen time                                                                        | 16(47)                 | 17(50)       | 0.808   | 18(60)                    | 17(57)      | 0.793   | 21(68)                  | 21(68)      | 1.00    |
| 6 hours per day or more (vs. less than 6 hours)                                    |                        |              |         |                           |             |         |                         |             |         |
| <b>Adiposity outcomes: mean (SD)</b>                                               |                        |              |         |                           |             |         |                         |             |         |
| BMI [kg/m <sup>2</sup> ]                                                           | 26.1(2.3)              | 26.4(2.8)    | 0.301   | 26.1(3.5)                 | 26.6(4.2)   | 0.048   | 26.1(3.7)               | 26.1(3.7)   | 0.903   |
| WC [cm]                                                                            | 90.1(8.2)              | 92.2(7.7)    | 0.078   | 92.1(9.4)                 | 94.0(11.8)  | 0.001   | 91.1(12.1)              | 91.9(11.6)  | 0.559   |
| WHtR [-]                                                                           | 0.49(0.04)             | 0.50(0.04)   | 0.070   | 0.50(0.05)                | 0.52(0.07)  | 0.001   | 0.51(0.06)              | 0.51(0.06)  | 0.608   |
| Body fat [%]                                                                       | 21.9(6.9)              | 23.0(6.2)    | 0.236   | 23.2(5.9)                 | 24.0(6.4)   | 0.078   | 24.5(7.3)               | 24.0(6.6)   | 0.516   |
| Visceral fat tissue [l]                                                            | 1.6(1.0)               | 2.0(1.0)     | 0.044   | 1.9(1.2)                  | 2.4(1.8)    | 0.006   | 2.9(5.3)                | 2.3(1.5)    | 0.494   |
| Skeletal muscle mass [%]                                                           | 39.1(3.3)              | 38.5(3.1)    | 0.196   | 38.3(2.8)                 | 37.4(5.1)   | 0.171   | 37.6(3.3)               | 37.4(3.0)   | 0.731   |
| <b>Metabolic outcomes: mean (SD)</b>                                               |                        |              |         |                           |             |         |                         |             |         |
| FBG [mg/dL]                                                                        | 82.2(11.5)             | 83.4(17.6)   | 0.724   | 85.4(13.7)                | 84.6(13.5)  | 0.799   | 89.2(11.2)              | 82.9(10.9)  | 0.014   |
| TG [mg/dL]                                                                         | 127.6(80.8)            | 129.2(105.2) | 0.947   | 131.5(93.3)               | 140.5(75.9) | 0.674   | 117.2(47.8)             | 139.2(78.2) | 0.183   |

|                                                                      |             |             |       |             |             |       |             |             |       |
|----------------------------------------------------------------------|-------------|-------------|-------|-------------|-------------|-------|-------------|-------------|-------|
| TC [mg/dL]                                                           | 188.0(39.4) | 188.1(53.0) | 0.997 | 192.9(32.0) | 203.8(29.9) | 0.566 | 200.0(31.9) | 202.2(38.0) | 0.762 |
| SBP [mmHg]                                                           | 127.7(11.7) | 129.8(10.3) | 0.422 | 124.2(13.6) | 133.1(15.5) | 0.001 | 128.5(14.3) | 133.7(12.9) | 0.062 |
| DBP [mmHg]                                                           | 75.7(10.6)  | 78.1(9.7)   | 0.096 | 77.7(8.7)   | 78.7(8.5)   | 0.442 | 80.5(8.1)   | 80.1(9.3)   | 0.710 |
| <b>Adiposity abnormalities: number of subjects (% of the sample)</b> |             |             |       |             |             |       |             |             |       |
| Normal weight (BMI = 18.5-24.9 kg/m <sup>2</sup> )                   | 11(32)      | 12(35)      |       | 9(30)       | 9(30)       |       | 16(52)      | 14(45)      |       |
| Overweight (BMI = 25-29.9 kg/m <sup>2</sup> )                        | 21(62)      | 17(50)      | 0.417 | 19(63)      | 19(63)      | 1.000 | 10(32)      | 12(39)      | 0.854 |
| Obesity (BMI ≥ 30 kg/m <sup>2</sup> )                                | 2(6)        | 5(15)       |       | 2(7)        | 2(7)        |       | 5(16)       | 5(16)       |       |
| Central obesity (WC ≥ 102 cm)                                        | 4(12)       | 3(9)        | 0.699 | 2(7)        | 6(20)       | 0.129 | 7(23)       | 6(19)       | 0.755 |
| Central obesity (WHtR ≥ 0.5)                                         | 14(41)      | 17(50)      | 0.465 | 11(37)      | 17(57)      | 0.121 | 16(52)      | 16(52)      | 1.00  |
| General obesity (Body fat ≥ 25%)                                     | 12(35)      | 13(38)      | 0.801 | 9(30)       | 12(40)      | 0.417 | 15(48)      | 12(39)      | 0.44  |
| Excess of visceral fat tissue (≥ Me, i.e., 1.565 l)                  | 17(50)      | 23(68)      | 0.139 | 16(53)      | 21(70)      | 0.184 | 17(55)      | 22(71)      | 0.189 |
| Increased skeletal muscle mass (≥ Me, i.e., 37%)                     | 24(71)      | 23(68)      | 0.793 | 20(67)      | 20(67)      | 1.00  | 16(52)      | 16(52)      | 1.00  |
| <b>Metabolic abnormalities: number of subjects (% of the sample)</b> |             |             |       |             |             |       |             |             |       |
| Elevated FBG (≥ 100 mg/dL)                                           | 1(3)        | 4(12)       | 0.163 | 4(13)       | 2(7)        | 0.389 | 4(13)       | 1(3)        | 0.162 |
| Elevated TG (≥ 150 mg/dL)                                            | 9(26)       | 7(21)       | 0.567 | 8(27)       | 12(40)      | 0.273 | 6(19)       | 10(33)      | 0.246 |
| Elevated TC (≥ 200 mg/dL)                                            | 13(38)      | 14(41)      | 0.804 | 13(43)      | 13(43)      | 1.00  | 17(55)      | 19(61)      | 0.607 |
| Elevated SBP (≥ 130 mmHg) or DBP (≥ 85 mmHg)                         | 15(44)      | 18(53)      | 0.467 | 13(43)      | 18(60)      | 0.197 | 14(45)      | 19(62)      | 0.203 |

<sup>1</sup> Adherence to the dietary-lifestyle pattern is based on subjects' tertile distribution: bottom tertile = lower adherence (used as the reference), middle tertile = moderate adherence, upper tertile = higher adherence; <sup>‡</sup> mean (standard deviation, SD); p-value of Pearson's chi-squared test (for categorical variables) or paired T-test (for continuous variables).



**Table S7. “Fast foods and stimulants” pattern: diet quality scores, family socio-economic and demographic status, adiposity and metabolic outcomes at baseline and after 2 years across the adherence <sup>1</sup> to the pattern.**

| Variables                                                                          | Lower adherence (n=31) |             |         | Moderate adherence (n=41) |              |         | Higher adherence (n=23) |             |         |
|------------------------------------------------------------------------------------|------------------------|-------------|---------|---------------------------|--------------|---------|-------------------------|-------------|---------|
|                                                                                    | Baseline               | After 2 yrs | p-value | Baseline                  | After 2 yrs  | p-value | Baseline                | After 2 yrs | p-value |
| <b>Diet quality scores: mean (SD)</b>                                              |                        |             |         |                           |              |         |                         |             |         |
| pHDI                                                                               | 31.4(10.1)             | 28.6(10.2)  | 0.184   | 22.5(10.7)                | 23.2(9.7)    | 0.645   | 20.7(7.8)               | 20.8(7.6)   | 0.953   |
| nHDI                                                                               | 17.1(7.2)              | 15.5(6.2)   | 0.169   | 17.8(7.8)                 | 17.1(9.1)    | 0.634   | 23.3(8.6)               | 20.4(8.8)   | 0.151   |
| <b>Socio-economic and demographic status: number of subjects (% of the sample)</b> |                        |             |         |                           |              |         |                         |             |         |
| Age (years) <sup>‡</sup>                                                           | 32.7(4.0)              | 34.6(4.1)   | 0.073   | 32.3(5.7)                 | 34.3(6.0)    | 0.114   | 30.9(6.1)               | 32.8(6.3)   | 0.306   |
| Age 19-30 years (vs. 31-40 years)                                                  | 4(13)                  | 4(13)       | 1.00    | 11(27)                    | 7(17)        | 0.286   | 9(39)                   | 7(30)       | 0.536   |
| Place of residence: Villages and towns (vs. big cities)                            | 5(16)                  | 6(19)       | 0.740   | 11(27)                    | 10(24)       | 0.800   | 8(35)                   | 5(22)       | 0.326   |
| Economic status: Modest (vs. comfortable or wealthy)                               | 11(35)                 | 8(26)       | 0.409   | 11(27)                    | 11(27)       | 1.00    | 7(30)                   | 3(13)       | 0.153   |
| Education: Secondary or lower (vs. higher)                                         | 6(19)                  | 5(16)       | 0.740   | 10(24)                    | 9(22)        | 0.793   | 11(48)                  | 9(39)       | 0.552   |
| <b>Family status: number of subjects (% of the sample)</b>                         |                        |             |         |                           |              |         |                         |             |         |
| In relationship Yes (vs. No)                                                       | 26(84)                 | 26(84)      | 1.00    | 28(68)                    | 30(73)       | 0.627   | 15(65)                  | 17(74)      | 0.522   |
| Having children Yes (vs. No)                                                       | 15(48)                 | 18(58)      | 0.445   | 17(41)                    | 20(49)       | 0.506   | 9(39)                   | 13(57)      | 0.238   |
| <b>Lifestyle factors: number of subjects (% of the sample)</b>                     |                        |             |         |                           |              |         |                         |             |         |
| Number of meals per day: 3 or less (vs. 4 or more)                                 | 6(19)                  | 7(23)       | 0.755   | 10(24)                    | 15(37)       | 0.230   | 11(48)                  | 9(39)       | 0.552   |
| Physical activity at work or school<br>Low (vs. moderate or high)                  | 15(48)                 | 14(45)      | 0.799   | 24(59)                    | 25(61)       | 0.822   | 9(39)                   | 11(48)      | 0.552   |
| Recreational physical activity<br>Low (vs. moderate or high)                       | 3(10)                  | 1(3)        | 0.301   | 9(22)                     | 4(10)        | 0.131   | 7(30)                   | 4(17)       | 0.300   |
| Current smoking Yes (vs. No)                                                       | 0(0)                   | 3(10)       | 0.076   | 2(5)                      | 3(7)         | 0.644   | 10(43)                  | 5(22)       | 0.116   |
| Smoking in the past Yes (vs. No)                                                   | 6(19)                  | 7(23)       | 0.756   | 13(32)                    | 12(29)       | 0.810   | 16(70)                  | 16(70)      | 1.00    |
| Screen time<br>6 hours per day or more (vs. less than 6 hours)                     | 17(55)                 | 18(58)      | 0.798   | 26(63)                    | 26(63)       | 1.00    | 12(52)                  | 11(48)      | 0.768   |
| <b>Adiposity outcomes: mean (SD)</b>                                               |                        |             |         |                           |              |         |                         |             |         |
| BMI [kg/m <sup>2</sup> ]                                                           | 25.8(3.5)              | 25.9(4.4)   | 0.754   | 26.0(3.0)                 | 26.3(3.1)    | 0.408   | 26.7(3.0)               | 27.2(3.0)   | 0.076   |
| WC [cm]                                                                            | 88.7(9.6)              | 91.2(11.3)  | 0.073   | 90.9(9.9)                 | 92.0(9.1)    | 0.284   | 92.0(10.3)              | 95.9(11.0)  | 0.003   |
| WHtR [-]                                                                           | 0.49(0.06)             | 0.50(0.07)  | 0.063   | 0.50(0.05)                | 0.50(0.05)   | 0.327   | 0.51(0.05)              | 0.53(0.05)  | 0.003   |
| Body fat [%]                                                                       | 21.7(6.2)              | 22.2(5.9)   | 0.360   | 23.3(6.9)                 | 23.8(5.8)    | 0.529   | 25.0(7.0)               | 25.3(7.6)   | 0.557   |
| Visceral fat tissue [l]                                                            | 1.7(1.3)               | 2.0(1.7)    | 0.071   | 1.9(1.1)                  | 2.2(1.1)     | 0.119   | 3.1(6.1)                | 2.6(1.5)    | 0.659   |
| Skeletal muscle mass [%]                                                           | 39.0(3.0)              | 37.9(5.0)   | 0.118   | 38.3(3.3)                 | 38.1(2.8)    | 0.555   | 37.5(3.1)               | 37.2(3.6)   | 0.280   |
| <b>Metabolic outcomes: mean (SD)</b>                                               |                        |             |         |                           |              |         |                         |             |         |
| FBG [mg/dL]                                                                        | 82.7(12.0)             | 80.4(15.1)  | 0.541   | 85.0(12.0)                | 85.0(14.8)   | 0.991   | 90.2(12.5)              | 85.5(11.8)  | 0.120   |
| TG [mg/dL]                                                                         | 125.8(95.2)            | 128.4(80.7) | 0.904   | 121.1(74.1)               | 140.1(102.9) | 0.368   | 132.7(45.6)             | 138.9(66.4) | 0.680   |
| TC [mg/dL]                                                                         | 189.1(23.1)            | 193.0(47.7) | 0.699   | 194.7(39.2)               | 195.7(37.5)  | 0.857   | 196.1(23.1)             | 207.3(42.3) | 0.181   |

|                                                                      |             |             |       |             |             |       |             |             |       |
|----------------------------------------------------------------------|-------------|-------------|-------|-------------|-------------|-------|-------------|-------------|-------|
| SBP [mmHg]                                                           | 127.3(12.0) | 129.3(14.2) | 0.397 | 124.2(12.0) | 130.4(10.2) | 0.007 | 131.0(15.9) | 139.0(13.8) | 0.047 |
| DBP [mmHg]                                                           | 79.8(8.4)   | 80.1(9.0)   | 0.795 | 75.8(8.7)   | 76.5(6.6)   | 0.474 | 79.2(11.2)  | 81.8(12.1)  | 0.187 |
| <b>Adiposity abnormalities: number of subjects (% of the sample)</b> |             |             |       |             |             |       |             |             |       |
| Normal weight (BMI = 18.5-24.9 kg/m <sup>2</sup> )                   | 13(42)      | 15(48)      |       | 14(34)      | 13(32)      |       | 9(39)       | 7(30)       |       |
| Overweight (BMI = 25-29.9 kg/m <sup>2</sup> )                        | 16(52)      | 13(42)      | 0.721 | 25(61)      | 23(56)      | 0.496 | 9(39)       | 12(52)      | 0.674 |
| Obesity (BMI ≥ 30 kg/m <sup>2</sup> )                                | 2(6)        | 3(10)       |       | 2(5)        | 5(12)       |       | 5(22)       | 4(17)       |       |
| Central obesity (WC ≥ 102 cm)                                        | 3(10)       | 2(6)        | 0.641 | 4(10)       | 5(12)       | 0.724 | 6(26)       | 8(35)       | 0.178 |
| Central obesity (WHtR ≥ 0.5)                                         | 9(29)       | 13(42)      | 0.288 | 21(51)      | 21(51)      | 1.00  | 11(48)      | 16(70)      | 0.002 |
| General obesity (Body fat ≥ 25%)                                     | 8(26)       | 8(26)       | 1.00  | 18(44)      | 19(46)      | 0.824 | 10(43)      | 10(43)      | 1.00  |
| Excess of visceral fat tissue (≥ Me, i.e., 1.565 l)                  | 11(35)      | 18(58)      | 0.075 | 26(63)      | 30(73)      | 0.342 | 13(57)      | 18(78)      | 0.020 |
| Increased skeletal muscle mass (≥ Me, i.e., 37%)                     | 23(74)      | 23(74)      | 1.00  | 23(56)      | 23(56)      | 1.00  | 14(61)      | 13(57)      | 0.575 |
| <b>Metabolic abnormalities: number of subjects (% of the sample)</b> |             |             |       |             |             |       |             |             |       |
| Elevated FBG (≥ 100 mg/dL)                                           | 2(6)        | 2(6)        | 1.00  | 3(7)        | 4(10)       | 0.693 | 4(17)       | 1(4)        | 0.004 |
| Elevated TG (≥ 150 mg/dL)                                            | 9(29)       | 7(23)       | 0.562 | 9(20)       | 13(32)      | 0.206 | 6(26)       | 9(39)       | 0.056 |
| Elevated TC (≥ 200 mg/dL)                                            | 12(39)      | 13(42)      | 0.796 | 18(44)      | 20(49)      | 0.658 | 13(57)      | 13(57)      | 1.00  |
| Elevated SBP (≥ 130 mmHg) or DBP (≥ 85 mmHg)                         | 14(45)      | 15(48)      | 0.780 | 14(34)      | 22(54)      | 0.075 | 14(61)      | 18(78)      | 0.011 |

<sup>1</sup> Adherence to the dietary-lifestyle pattern is based on subjects' tertile distribution: bottom tertile = lower adherence (used as the reference), middle tertile = moderate adherence, upper tertile = higher adherence; <sup>‡</sup> mean (standard deviation, SD); p-value of Pearson's chi-squared test (for categorical variables) or paired T-test (for continuous variables).

**Table S8.** “Healthy diet, activity at work, former smoking” pattern: diet quality scores, family socio-economic and demographic status, and adiposity and metabolic outcomes at baseline and after 2 years across the adherence <sup>1</sup> to the pattern.

| Variables                                                                          | Lower Adherence (n=34) |             |         | Moderate Adherence (n=31) |              |         | Higher Adherence (n=30) |             |         |
|------------------------------------------------------------------------------------|------------------------|-------------|---------|---------------------------|--------------|---------|-------------------------|-------------|---------|
|                                                                                    | Baseline               | After 2 yrs | p-value | Baseline                  | After 2 yrs  | p-value | Baseline                | After 2 yrs | p-value |
| <b>Diet quality scores: mean (SD)</b>                                              |                        |             |         |                           |              |         |                         |             |         |
| pHDI                                                                               | 15.1(5.2)              | 18.8(7.8)   | 0.003   | 24.3(4.6)                 | 24.6(7.9)    | 0.862   | 36.9(8.0)               | 30.5(10.1)  | 0.005   |
| nHDI                                                                               | 19.7(7.9)              | 19.4(9.0)   | 0.787   | 19.8(8.3)                 | 17.1(8.1)    | 0.110   | 16.9(8.1)               | 15.4(7.4)   | 0.328   |
| <b>Socio-economic and demographic status: number of subjects (% of the sample)</b> |                        |             |         |                           |              |         |                         |             |         |
| Age (years) <sup>‡</sup>                                                           | 31.2(5.6)              | 33.0(5.6)   | 0.185   | 32.1(5.5)                 | 34.1(5.5)    | 0.156   | 33.1(4.8)               | 35.2(5.4)   | 0.119   |
| Age 19-30 years ( <i>vs.</i> 31-40 years)                                          | 10(29)                 | 8(24)       | 0.582   | 7(23)                     | 5(16)        | 0.520   | 7(23)                   | 5(17)       | 0.519   |
| Place of residence: <i>Villages and towns (vs. big cities)</i>                     | 10(29)                 | 8(24)       | 0.582   | 9(29)                     | 6(19)        | 0.374   | 5(17)                   | 7(23)       | 0.519   |
| Economic status: <i>Modest (vs. comfortable or wealthy)</i>                        | 11(32)                 | 7(21)       | 0.271   | 11(35)                    | 8(26)        | 0.409   | 7(23)                   | 7(23)       | 1.00    |
| Education: <i>Secondary or lower (vs. higher)</i>                                  | 8(24)                  | 7(21)       | 0.770   | 11(35)                    | 9(29)        | 0.587   | 8(27)                   | 7(23)       | 0.766   |
| <b>Family status: number of subjects (% of the sample)</b>                         |                        |             |         |                           |              |         |                         |             |         |
| In relationship <i>Yes (vs. No)</i>                                                | 21(62)                 | 21(62)      | 1.00    | 21(68)                    | 24(77)       | 0.393   | 27(90)                  | 28(93)      | 0.640   |
| Having children <i>Yes (vs. No)</i>                                                | 11(32)                 | 14(41)      | 0.451   | 14(45)                    | 20(65)       | 0.126   | 16(53)                  | 17(57)      | 0.780   |
| <b>Lifestyle factors: number of subjects (% of the sample)</b>                     |                        |             |         |                           |              |         |                         |             |         |
| Number of meals per day: <i>3 or less (vs. 4 or more)</i>                          | 17(50)                 | 15(44)      | 0.627   | 8(26)                     | 11(35)       | 0.409   | 2(7)                    | 5(17)       | 0.228   |
| Physical activity at work or school<br><i>Low (vs. moderate or high)</i>           | 25(74)                 | 23(68)      | 0.594   | 13(42)                    | 15(48)       | 0.610   | 10(33)                  | 12(40)      | 0.592   |
| Recreational physical activity<br><i>Low (vs. moderate or high)</i>                | 12(35)                 | 6(18)       | 0.099   | 6(19)                     | 3(10)        | 0.279   | 1(3)                    | 0(0)        | 0.313   |
| Current smoking <i>Yes (vs. No)</i>                                                | 1(3)                   | 3(9)        | 0.303   | 7(23)                     | 4(13)        | 0.319   | 4(13)                   | 4(13)       | 1.00    |
| Smoking in the past <i>Yes (vs. No)</i>                                            | 10(29)                 | 8(24)       | 0.582   | 13(42)                    | 13(42)       | 1.00    | 12(40)                  | 14(47)      | 0.602   |
| Screen time<br><i>6 hours per day or more (vs. less than 6 hours)</i>              | 26(76)                 | 25(74)      | 0.779   | 18(58)                    | 17(55)       | 0.798   | 11(37)                  | 13(43)      | 0.598   |
| <b>Adiposity outcomes: mean (SD)</b>                                               |                        |             |         |                           |              |         |                         |             |         |
| BMI [kg/m <sup>2</sup> ]                                                           | 25.5(3.0)              | 25.6(3.0)   | 0.541   | 26.5(3.9)                 | 26.9(4.6)    | 0.320   | 26.4(2.5)               | 26.7(2.7)   | 0.222   |
| WC [cm]                                                                            | 89.3(8.8)              | 90.8(9.5)   | 0.147   | 92.0(12.1)                | 94.8(13.6)   | 0.049   | 90.3(8.7)               | 92.6(6.8)   | 0.045   |
| WHtR [-]                                                                           | 0.49(0.05)             | 0.50(0.05)  | 0.180   | 0.51(0.06)                | 0.52(0.08)   | 0.067   | 0.49(0.04)              | 0.51(0.03)  | 0.024   |
| Body fat [%]                                                                       | 23.8(6.7)              | 23.5(6.2)   | 0.644   | 23.6(7.9)                 | 25.0(7.4)    | 0.110   | 21.9(5.4)               | 22.4(5.2)   | 0.501   |
| Visceral fat tissue [l]                                                            | 1.9(1.1)               | 2.1(1.2)    | 0.125   | 3.0(5.3)                  | 2.7(2.0)     | 0.727   | 1.6(0.8)                | 2.0(1.0)    | 0.026   |
| Skeletal muscle mass [%]                                                           | 37.7(3.1)              | 37.4(4.9)   | 0.570   | 38.1(3.7)                 | 37.2(3.4)    | 0.033   | 39.3(2.5)               | 38.9(2.5)   | 0.247   |
| <b>Metabolic outcomes: mean (SD)</b>                                               |                        |             |         |                           |              |         |                         |             |         |
| FBG [mg/dL]                                                                        | 86.4(11.9)             | 81.2(14.4)  | 0.039   | 86.9(13.6)                | 85.0(13.9)   | 0.535   | 83.0(11.4)              | 84.9(14.5)  | 0.600   |
| TG [mg/dL]                                                                         | 131.9(88.8)            | 132.8(72.7) | 0.965   | 118.3(55.3)               | 151.4(108.5) | 0.144   | 125.4(79.8)             | 123.9(78.6) | 0.939   |
| TC [mg/dL]                                                                         | 193.6(32.7)            | 197.8(35.6) | 0.428   | 188.5(35.1)               | 201.0(40.8)  | 0.067   | 198.5(37.3)             | 194.0(50.7) | 0.626   |

|                                                                      |             |             |       |             |             |       |             |             |       |
|----------------------------------------------------------------------|-------------|-------------|-------|-------------|-------------|-------|-------------|-------------|-------|
| SBP [mmHg]                                                           | 126.6(14.5) | 133.5(13.0) | 0.023 | 127.4(13.1) | 131.8(13.9) | 0.121 | 126.5(12.2) | 130.9(12.2) | 0.058 |
| DBP [mmHg]                                                           | 77.6(9.5)   | 79/1(8.5)   | 0.196 | 78.3(12.0)  | 79.0(12.5)  | 0.637 | 77.9(5.9)   | 78.7(5.1)   | 0.499 |
| <b>Adiposity abnormalities: number of subjects (% of the sample)</b> |             |             |       |             |             |       |             |             |       |
| Normal weight (BMI = 18.5-24.9 kg/m <sup>2</sup> )                   | 17(50)      | 18(53)      |       | 12(39)      | 10(32)      |       | 7(23)       | 7(23)       |       |
| Overweight (BMI = 25-29.9 kg/m <sup>2</sup> )                        | 13(38)      | 13(38)      | 0.918 | 15(48)      | 15(48)      | 0.748 | 22(73)      | 20(67)      | 0.578 |
| Obesity (BMI ≥ 30 kg/m <sup>2</sup> )                                | 4(12)       | 3(9)        |       | 4(13)       | 6(19)       |       | 1(3)        | 3(10)       |       |
| Central obesity (WC ≥ 102 cm)                                        | 3(9)        | 5(15)       | 0.452 | 8(26)       | 9(29)       | 0.776 | 2(7)        | 1(3)        | 0.554 |
| Central obesity (WHtR ≥ 0.5)                                         | 14(41)      | 16(47)      | 0.625 | 16(52)      | 17(55)      | 0.799 | 11(37)      | 17(57)      | 0.121 |
| General obesity (Body fat ≥ 25%)                                     | 16(47)      | 13(38)      | 0.462 | 14(45)      | 16(52)      | 0.611 | 6(20)       | 8(27)       | 0.541 |
| Excess of visceral fat tissue (≥ Me, i.e., 1.565 l)                  | 20(59)      | 22(65)      | 0.618 | 18(58)      | 22(71)      | 0.289 | 12(40)      | 22(73)      | 0.009 |
| Increased skeletal muscle mass (≥ Me, i.e., 37%)                     | 18(53)      | 21(62)      | 0.462 | 17(55)      | 15(48)      | 0.611 | 25(83)      | 23(77)      | 0.519 |
| <b>Metabolic abnormalities: number of subjects (% of the sample)</b> |             |             |       |             |             |       |             |             |       |
| Elevated FBG (≥ 100 mg/dL)                                           | 2(6)        | 2(6)        | 1.00  | 5(16)       | 3(10)       | 0.449 | 2(7)        | 2(7)        | 1.00  |
| Elevated TG (≥ 150 mg/dL)                                            | 7(21)       | 9(26)       | 0.567 | 9(29)       | 12(39)      | 0.421 | 7(23)       | 8(27)       | 0.766 |
| Elevated TC (≥ 200 mg/dL)                                            | 15(44)      | 19(56)      | 0.332 | 13(42)      | 15(48)      | 0.610 | 15(50)      | 12(40)      | 0.436 |
| Elevated SBP (≥ 130 mmHg) or DBP (≥ 85 mmHg)                         | 15(44)      | 19(56)      | 0.332 | 16(52)      | 19(62)      | 0.442 | 11(37)      | 17(57)      | 0.121 |

<sup>1</sup> Adherence to the dietary-lifestyle pattern is based on subjects' tertile distribution: bottom tertile = lower adherence (used as the reference), middle tertile = moderate adherence, upper tertile = higher adherence; <sup>‡</sup> mean (standard deviation, SD); p-value of Pearson's chi-squared test (for categorical variables) or paired T-test (for continuous variables).
